# Supplementary material
Source: PubMed Central journal article supplement (PMC3022423)
Supplement: neo1301_0001SD1.pdf [file neo1301_0001SD1.pdf]

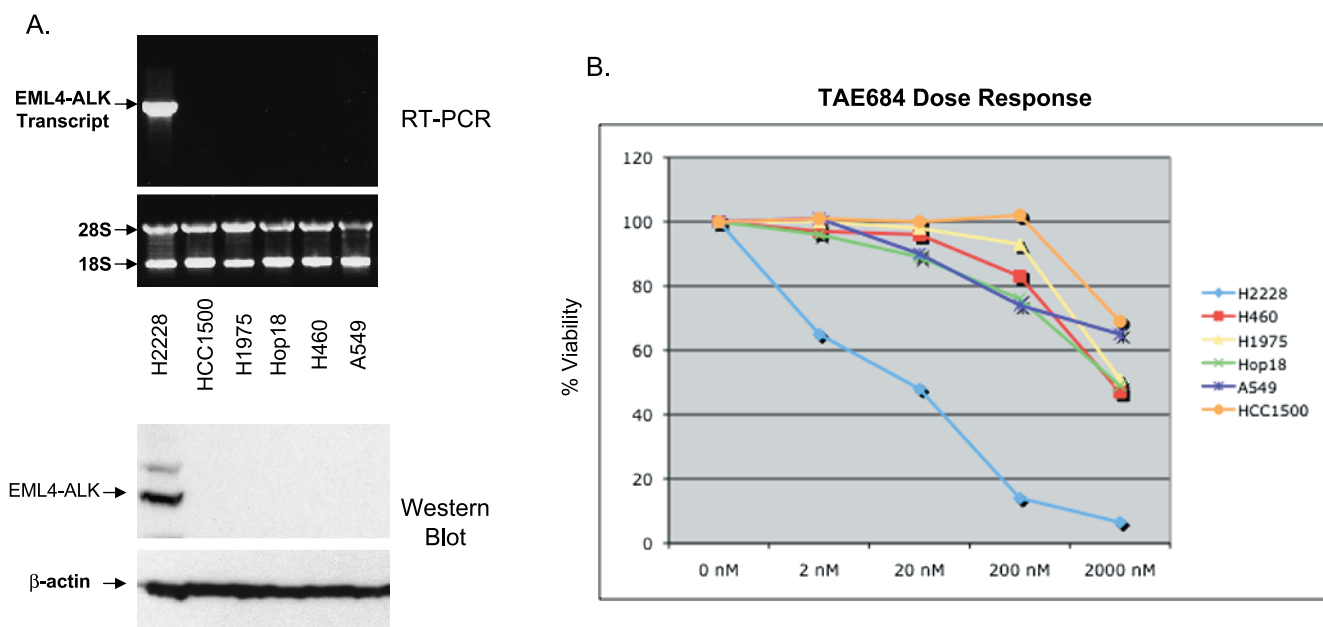

**Figure W1.** Sensitivity of NSCLC cell lines to TAE684. (A) Expression of EML4-ALK in NSCLC cell lines. Upper panel: mRNA expression; lower panel: protein expression. (B) TAE684 selectivity reduces the viability of NSCLC H2228 that harbors EML4-ALK fusion. Cells were cultured in medium containing 10% FBS and treated with indicated concentrations of TAE684 for 72 hours. Cell viability was measured using CellTiter Glo reagent.

**Table W1.** Cellular Processes and Number of Genes That Are Modulated by TAE684 Treatment in H2228 Xenograft.

| GO ID      | GO Term                                                               | <i>P</i>   | No. Genes |
|------------|-----------------------------------------------------------------------|------------|-----------|
| GO:0007049 | cell cycle                                                            | 9.73e - 22 | 151       |
| GO:0006259 | DNA metabolic process                                                 | 1.92e - 15 | 98        |
| GO:0016043 | cellular component organization                                       | 2.43e - 12 | 265       |
| GO:0008283 | cell proliferation                                                    | 8.97e - 12 | 134       |
| GO:0006996 | organelle organization                                                | 8.76e - 11 | 165       |
| GO:0007005 | mitochondrion organization                                            | 3.93e - 07 | 26        |
| GO:0006950 | response to stress                                                    | 0.00000264 | 166       |
| GO:0008219 | cell death                                                            | 0.0000207  | 117       |
| GO:0016265 | death                                                                 | 0.0000249  | 117       |
| GO:0044238 | primary metabolic process                                             | 0.0000286  | 647       |
| GO:0008152 | metabolic process                                                     | 0.0000511  | 706       |
| GO:0006139 | nucleobase, nucleoside, nucleotide and nucleic acid metabolic process | 0.000213   | 359       |
| GO:0007010 | cytoskeleton organization                                             | 0.00107    | 52        |
| GO:0006519 | cellular amino acid and derivative metabolic process                  | 0.00498    | 42        |
| GO:0009605 | response to external stimulus                                         | 0.00539    | 81        |
| GO:0005975 | carbohydrate metabolic process                                        | 0.0147     | 57        |
| GO:0006629 | lipid metabolic process                                               | 0.018      | 81        |
| GO:0006091 | generation of precursor metabolites and energy                        | 0.0232     | 36        |
| GO:0009058 | biosynthetic process                                                  | 0.0452     | 359       |
| GO:0009628 | response to abiotic stimulus                                          | 0.0693     | 28        |
